# Supplementary material for: Early deprivation alters structural brain development from middle childhood to adolescence
Source: PubMed Central journal article supplement — Sci Adv. 2022 Oct 7;8(40):eabn4316. doi: 10.1126/sciadv.abn4316 (PMC9544316; doi:10.1126/sciadv.abn4316), 2022-10-07
Supplement: sciadv.abn4316_sm.pdf [file sciadv.abn4316_sm.pdf]

Supplementary Materials for  
**Early deprivation alters structural brain development from middle childhood  
to adolescence**

Margaret A. Sheridan *et al.*

Corresponding author: Margaret A. Sheridan, [sheridan.margaret@unc.edu](mailto:sheridan.margaret@unc.edu)

*Sci. Adv.* **8**, eabn4316 (2022)  
DOI: 10.1126/sciadv.abn4316

**This PDF file includes:**

Region of interest analysis  
Impact of institutionalization on subcortical volume without controls for ICV  
Nonsignificant results (group effects)  
Associations between neural structure and psychopathology  
Longitudinal change  
Figs. S1 to S4  
Tables S1 to S3  
References

## Supplementary Results

### Region of Interest analysis.

We sought to confirm our findings in the whole brain using an ROI approach because this allowed us to take a stricter approach to multiple comparisons. In this approach we took ROIs which overlapped with findings from (28) because this is the only paper reports findings from a sample of post-pubertal individuals who were exposed to institutionalization. Thus, these findings are likely to be most similar to what we would expect to observe here. Mackes and colleagues observed differences in cortical surface area and thickness associated with exposure to institutionalization in the inferior frontal gyrus, anterior cingulate cortex, and temporal pole(28). Using structurally defined regions of interest with the Desikan and Killiany atlas (78) we examined group (FCG vs CAUG) differences in thickness at age 16 in six regions: right and left caudal anterior cingulate cortex, left and right pars triangularis, and left and right temporal pole. We set our threshold for significance at  $p < .008$  using a Bonferonni correction. We observed significant differences between CAUG and FCG in two regions of interest, the left caudal anterior cingulate cortex ( $t_{79} = 3.06, p = .001, d = .21$ ) and pars triangularis ( $t_{79} = 3.13, p = .001, d = .15$ ). These anatomically defined regions overlap significantly spatially with differences we observed in the whole brain analysis. No other regions were significantly different between groups (all  $p$ 's  $> .07$ ).

### Impact of institutionalization on subcortical volume without controls for ICV

When not controlling for intracranial volume, ever-institutionalized children had significantly smaller right ( $F_{1,111} = 6.10, p = .02, \eta^2_{\text{c}} .052$ ) and left ( $F_{1,111} = 2.74, p = .10, \eta^2_{\text{c}} .024$ ) hippocampus, right ( $F_{1,111} = 4.52, p = .04, \eta^2_{\text{c}} .039$ ) and left ( $F_{1,111} = 4.36, p = .04, \eta^2_{\text{c}} .038$ ) amygdala, and right ( $F_{1,111} = 8.09, p = .005, \eta^2_{\text{c}} .068$ ) and left ( $F_{1,111} = 12.17, p < .001, \eta^2_{\text{c}} .099$ ) thalamus volume relative to never-institutionalized children following correction for multiple comparisons using false discovery rate(75) (FDR). However, none of these differences were significant after controlling for total intracranial volume.

### Non-significant results (group effects)

We found no evidence for significant differences in subcortical volume at 16 years of age between children in the ever vs. never institutionalized groups in the right ( $F_{1,111} = 1.88, p = .17, \eta^2 = .017$ ) and left ( $F_{1,111} = 1.02, p = .32, \eta^2 = .009$ ) caudate, right ( $F_{1,111} = .98, p = .32, \eta^2 = .009$ ) and left ( $F_{1,111} = .23, p = .64, \eta^2 = .002$ ) putamen, or the right ( $F_{1,111} = 1.95, p = .17, \eta^2 = .017$ ) and left ( $F_{1,111} = .67, p = .41, \eta^2 = .006$ ) globus pallidus after controlling for multiple comparisons.

We found no evidence for the impact of foster care intervention on subcortical volume at 16 years of age in the right ( $t_{80} = 1.01, p = .16, d = .22$ ) and left ( $t_{80} = 1.15, p = .13, d = .25$ ) hippocampus, right ( $t_{80} = 1.30, p = .10, d = .29$ ) and left ( $t_{80} = 1.61, p = .06, d = .36$ ) amygdala, right ( $t_{80} = .19, p = .42, d = .043$ ) and left ( $t_{80} = -.05, p = .48, d = -.01$ ) caudate, right ( $t_{80} = .94, p = .18, d = .21$ ) and left ( $t_{80} = 1.82, p = .04, d = .40$ ) putamen, right ( $t_{80} = .90, p = .19, d = .19$ ) and left ( $t_{80} = .06, p = .48, d = .014$ ) globus pallidus, or right ( $t_{80} = .83, p = .21, d = .18$ ) and left ( $t_{80} = .83, p = .20, d = .18$ ) thalamus after controlling for multiple comparisons.

We found no evidence for the impact of randomization out of foster care intervention early vs. late on subcortical volume at 16 years of age in the right ( $t_{39} = .87, p = .20, d = .27$ ) and left ( $t_{39} = .94, p = .18, d = .29$ ) hippocampus, right ( $t_{39} = .58, p = .28, d = .18$ ) and left ( $t_{39} = 1.21, p = .12, d = .38$ ) amygdala, right ( $t_{39} = .60, p = .28, d = .19$ ) and left ( $t_{39} = .36, p = .36, d = .11$ ) caudate, right ( $t_{39} = 1.35, p = .09, d = .42$ ) and left ( $t_{39} = 1.83, p = .04, d = .57$ ) putamen, right ( $t_{39} = .32, p = .38, d = .10$ ) and left ( $t_{39} = .96, p = .17, d = .29$ ) globus pallidus, or right ( $t_{39} = -.37, p = .36, d = -.12$ ) and left ( $t_{39} = -.21, p = .42, d = -.06$ ) thalamus after controlling for multiple comparisons.

### **Associations between neural structure and psychopathology**

We examined associations between psychopathology as measured by factor scores and cortical thickness in the two regions in the left hemisphere (ACC and IFG) which showed a significant impact of randomization to foster care on neural structure at age 16 controlling for age at scan and gender. As reported in the paper thickness in the ACC significantly predicted factor scores on the externalizing factor but not the 'p' factor, or internalizing factor. Thickness in the IFG did not significantly predict factor

scores on the externalizing ( $\beta = .09$ ,  $t = .82$ ,  $p = .41$ ,  $f^2 = .008$ ), internalizing ( $\beta = .11$ ,  $t = .98$ ,  $p = .33$ ,  $f^2 = .019$ ) or 'p' factor ( $\beta = .14$ ,  $t = 1.25$ ,  $p = .21$ ,  $f^2 = .012$ ).

### **Longitudinal change**

Because acquisition parameters changed between 8 and 16 years, we wanted to document that we observed patterns of change in cortical volume from 9 -16 years which would be expected based on prior research. Here we report on change in volume and thickness across all participants regardless of group. Given that this sample is not representative of any specific population we report these findings only as a methods note to the overall paper. First, as expected based on previous work(32,45), we observed significant reductions in grey matter volume ( $F_{1,61} = 9.32$ ,  $p < .003$ ) and increases in white matter volume ( $F_{1,61} = 7.94$ ,  $p < .007$ ) from early to middle adolescence.

Second, as expected based on previous work, subcortical volume also changed from 9 to 16 years in this sample(4). We observed significant reductions over time in subcortical grey matter volume in the left ( $F_{1,61} = 5.41$ ,  $p = .02$ ) and right ( $F_{1,61} = 10.15$ ,  $p = .002$ ) hippocampus, right amygdala ( $F_{1,61} = 3.99$ ,  $p = .05$ ), right thalamus ( $F_{1,61} = 4.25$ ,  $p = .04$ ), left ( $F_{1,61} = 11.98$ ,  $p = .001$ ) and right caudate ( $F_{1,61} = 7.09$ ,  $p = .01$ ), and in the left ( $F_{1,61} = 13.59$ ,  $p < .001$ ) and right ( $F_{1,61} = 10.94$ ,  $p = .002$ ) pallidum. Of these regions, change in the right hippocampus, caudate, and pallidum remained significant after controlling for multiple comparisons.

Third, we examined change in cortical thickness and surface area from 9 to 16 years of age in a vertex-wise analysis that controlled for multiple comparisons. As predicted from the extant literature, cortical thickness decreased across age in most areas of cortex (Figure S3; Table S1). This change was prominent across temporal cortex, IFG, medial PFC and the post central gyrus.

**Fig. S1.**

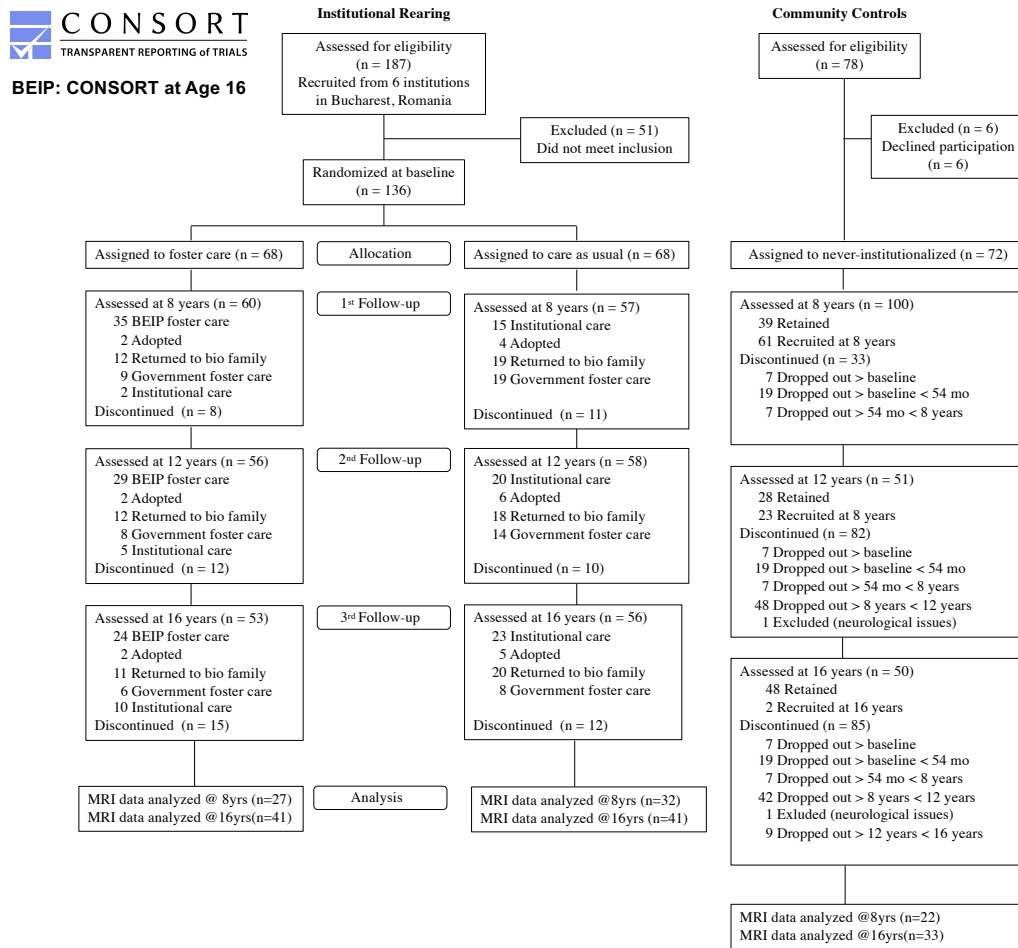

**Figure S1. Consort diagram for the BEIP study through 16 years of age.** At the third follow-up (16 years) the following participants were re-enrolled into the parent study (FCG n = 53; CAUG n = 56; NIG n = 50). At both 9 and 16 years, not every participant was able to be recruited into the MRI portion of the study, many refused to participate because of concerns about the MRI scanner, others because of time constraints with scheduling or funding. As a result, the final number of participants for the MRI portions of the study are smaller than for the parent study at both 9 and 16 years. More participants were successfully recruited into the MRI portion of the study at 16 relative to 9 years, primarily due to funding constraints at the 9 year time point. Many participants in the ‘never institutionalized’ group refused further participation in all portions of the study. This is indicated in the ‘Community Controls’ portion of the diagram. As can be observed, these participants left at every time point (for example, in the final sample at 16 years 7 dropped out before the baseline, 19 dropped out between the baseline and 54 month follow up, etc.).

**Fig. S2.**

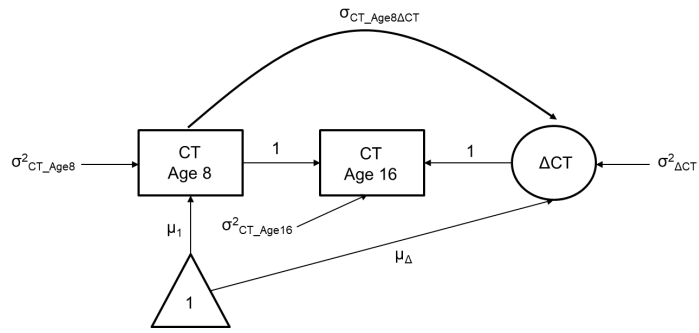

**Figure S2. Latent Change Analysis.** Structure of the latent change score (LCS) analysis with change in cortical thickness (CT) from age 8 to 16 years predicted by initial level of CT at age 8 years. Group membership (care-as-usual = 0, foster care = 1) was added as a predictor of change ( $\Delta$ CT) in cortical thickness of the ACC and IFG (in separate models) given that these were the regions showing differences by intervention group. This analysis used a maximum likelihood with robust standard errors (MLR) estimator and used full-information maximum likelihood, meaning all participants with at least one data point at age 8 and/or 16 years were included in the analysis. This served as a test of robustness of the main results by

**Fig. S3.**

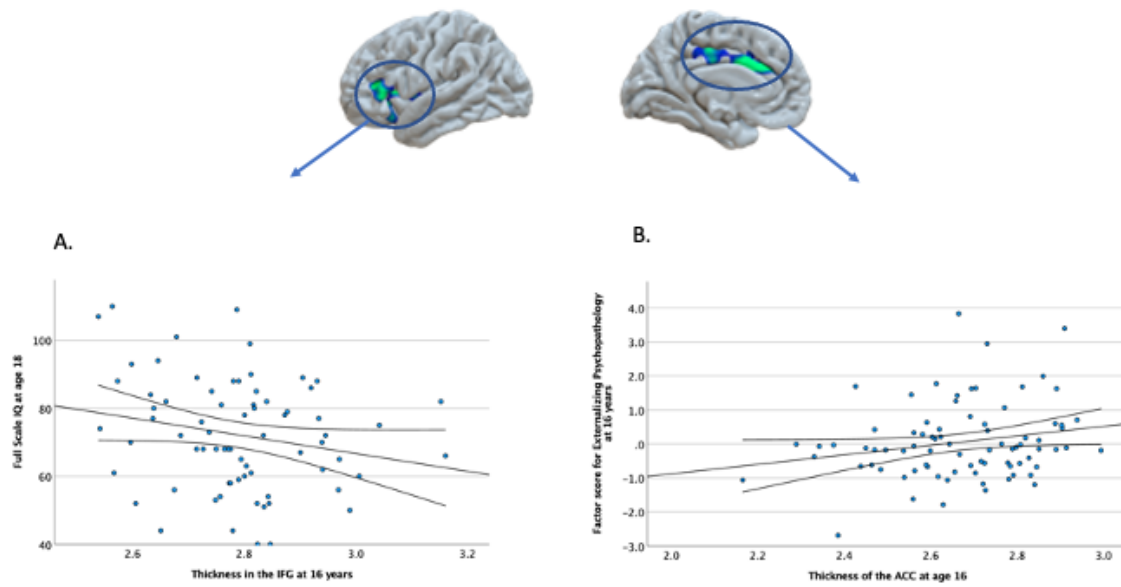

**Figure S3. Cortical Thickness and Developmental Outcomes.** Correlations between cortical thickness at age 16 in (A) the inferior frontal gyrus (IFG) and Full Scale IQ at age 18 years and (B) the anterior cingulate cortex (ACC) and externalizing factors scores at age 16.

**Fig. S4.**

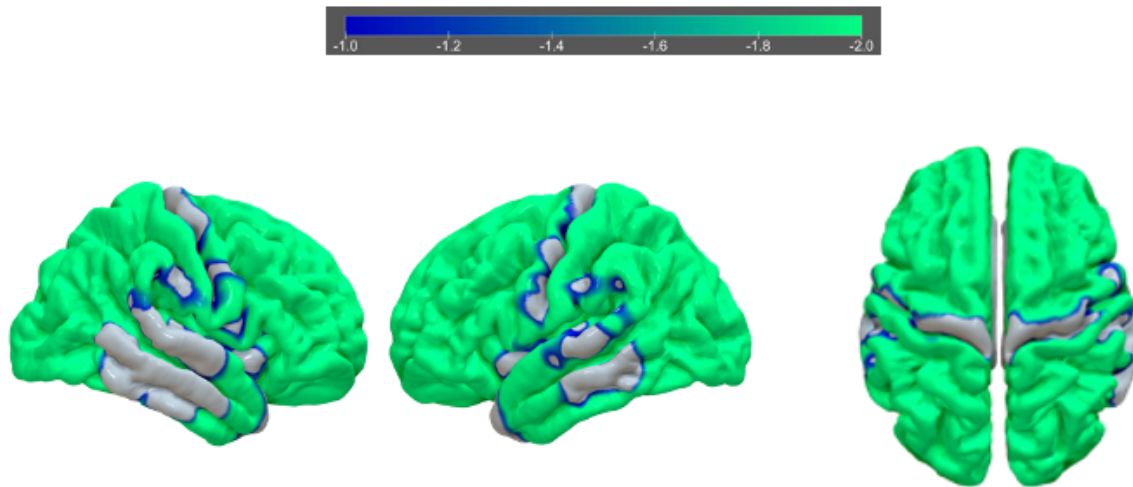

**Figure S4. Developmental change in thickness regardless of group assignment.** Areas of cortex showing significant decreases in thickness from 9 to 16 years regardless of experiences of institutionalization

**Table S1.**

|                                       | <b>CAUG</b> | <b>FCG</b>  | <b>NIG</b>  |
|---------------------------------------|-------------|-------------|-------------|
| Average age at 16 year follow up (SD) | 200m (5.8m) | 198m (6.2m) | 201m (5.6m) |
| Months between Scan 1 and Scan 2      | 84m         | 82m         | 78m         |
| Gender                                | 54% female  | 49% female  | 42% female  |

**Table S1.** Demographic and sample information



**Table S2.**

| Brain Area                                                         | Cluster size       | Z-value of Max Vertex | P-value of cluster | Approximate Coordinates of Max Vertex in MNI space |       |       |
|--------------------------------------------------------------------|--------------------|-----------------------|--------------------|----------------------------------------------------|-------|-------|
|                                                                    | (mm <sup>2</sup> ) | <i>z</i>              | <i>p</i>           | x                                                  | y     | z     |
| Change in thickness between 9 and 16 years across groups ( n = 64) |                    |                       |                    |                                                    |       |       |
| L Lat Orbital frontal cortex                                       | 71458              | -18.16                | >0.001             | -19.3                                              | 30.1  | -17.5 |
| R Lingual cortex                                                   | 67462              | -15.35                | >0.001             | 15.3                                               | -53.0 | -2.5  |

**Table S2.** Regions with significant differences in longitudinal cortical thickness (mm<sup>2</sup>) among all subjects regardless of group membership.

**Table S3.**

|                                              |       | CAUG (n = 40) | FCG (n= 41)  | NIG (n = 33)      |
|----------------------------------------------|-------|---------------|--------------|-------------------|
| Total grey matter volume (cubic centimeters) |       | 469.3(48.6)   | 470.4 (43.6) | 482.1 (51.5)<br>5 |
| Total white matter volume                    |       | 423.9 (49.1)  | 438.6 (48.7) | 456.6 (56.6)      |
| Amygdala                                     | Right | 1.5 (.2)      | 1.5 (.2)     | 1.5 (.2)          |
|                                              | Left  | 1.4 (.2)      | 1.5 (.2)     | 1.5 (.2)          |
| Hippocampus                                  | Right | 4.0 (.4)      | 4.0 (.4)     | 4.1 (.4)          |
|                                              | Left  | 3.9 (.4)      | 4.0 (.4)     | 4.0 (.4) 10       |
| Thalamus                                     | Right | 6.9 (.7)      | 7.0 (.8)     | 7.2 (.8)          |
|                                              | Left  | 7.4 (.7)      | 7.5 (.9)     | 7.9 (.8)          |
| Caudate                                      | Right | 3.9 (.5)      | 3.9 (.6)     | 3.9 (.5)          |
|                                              | Left  | 3.7 (.4)      | 3.7 (.5)     | 3.7 (.5)          |
| Putamen                                      | Right | 5.6 (.7)      | 5.7 (.5)     | 5.6 (.7) 15       |
|                                              | Left  | 5.6 (.8)      | 5.9 (.6)     | 5.8 (.9)          |
| Globus Pallidus                              | Right | 1.6 (.2)      | 1.6 (.2)     | 1.7 (.2)          |
|                                              | Left  | 1.7 (.3)      | 1.7 (.2)     | 1.7 (.3)          |

**Table S3.** Volume of total cortical grey and white matter as well as volume of six subcortical structures in cubic centimeters at the second (age 16 years) time point. Volume was measured using FreeSurfer analysis suite. Only differences between the EIG and NIG were significant for total grey and white matter volume.

## REFERENCES AND NOTES

1. K. J. Bos, N. Fox, C. H. Zeanah, C. A. Nelson III, Effects of early psychosocial deprivation on the development of memory and executive function. *Front. Behav. Neurosci.* **3**, 16 (2009).
2. M. A. Sheridan, K. A. McLaughlin, W. Winter, N. Fox, C. Zeanah, C. A. Nelson, Early deprivation disruption of associative learning is a developmental pathway to depression and social problems. *Nat. Commun.* **9**, 2216 (2018).
3. F. Tibu, M. A. Sheridan, K. A. McLaughlin, C. A. Nelson, N. A. Fox, C. H. Zeanah, Disruptions of working memory and inhibition mediate the association between exposure to institutionalization and symptoms of attention deficit hyperactivity disorder. *Psychol. Med.* **46**, 529–541 (2016).
4. K. L. Humphreys, L. McGoron, M. A. Sheridan, K. A. McLaughlin, N. A. Fox, C. A. Nelson, C. H. Zeanah, High-quality foster care mitigates callous-unemotional traits following early deprivation in boys: A randomized controlled trial. *J. Am. Acad. Child Adolesc. Psychiatry* **54**, 977–983 (2015).
5. C. H. Zeanah, H. L. Egger, A. T. Smyke, C. A. Nelson, N. A. Fox, P. J. Marshall, D. Guthrie, Institutional rearing and psychiatric disorders in Romanian preschool children. *Am. J. Psychiatry* **166**, 777–785 (2009).
6. A. N. Almas, K. A. Degnan, A. Radulescu, C. A. Nelson III, C. H. Zeanah, N. A. Fox, Effects of early intervention and the moderating effects of brain activity on institutionalized children's social skills at age 8. *Proc. Natl. Acad. Sci. U.S.A.* **109**, 17228–17231 (2012).
7. A. R. Levin, N. A. Fox, C. H. Zeanah Jr., C. A. Nelson, Social communication difficulties and autism in previously institutionalized children. *J. Am. Acad. Child Adolesc. Psychiatry* **54**, 108–115.e1 (2015).
8. K. A. McLaughlin, M. A. Sheridan, C. A. Nelson, Neglect as a violation of species-expectant experience: Neurodevelopmental consequences. *Biol. Psychiatry* **82**, 462–471 (2017).

9. N. Tottenham, The importance of early experiences for neuro-affective development. *Curr. Top. Behav. Neurosci.* **16**, 109–129 (2014).
10. M. A. Sheridan, K. A. McLaughlin, Neurobiological models of the impact of adversity on education. *Curr. Opin. Behav. Sci.* **10**, 108–113 (2016).
11. D. G. Gee, E. M. Cohodes, Influences of caregiving on development: A sensitive period for biological embedding of predictability and safety cues. *Curr. Dir. Psychol. Sci.* **30**, 376–383 (2021).
12. M. A. Sheridan, N. A. Fox, C. H. Zeanah, K. A. McLaughlin, C. A. Nelson III, Variation in neural development as a result of exposure to institutionalization early in childhood. *Proc. Natl. Acad. Sci. U.S.A.* **109**, 12927–12932 (2012).
13. C. A. Nelson III, C. H. Zeanah, N. A. Fox, P. J. Marshall, A. T. Smyke, D. Guthrie, Cognitive recovery in socially deprived young children: The Bucharest Early Intervention Project. *Science* **318**, 1937–1940 (2007).
14. K. L. Humphreys, M. M. Gleason, S. S. Drury, D. Miron, C. A. Nelson III, N. A. Fox, C. H. Zeanah, Effects of institutional rearing and foster care on psychopathology at age 12 years in Romania: Follow-up of an open, randomised controlled trial. *Lancet Psychiatry* **2**, 625–634 (2015).
15. B. Goff, D. G. Gee, E. H. Telzer, K. L. Humphreys, L. Gabard-Durnam, J. Flannery, N. Tottenham, Reduced nucleus accumbens reactivity and adolescent depression following early-life stress. *Neuroscience* **249**, 129–138 (2013).
16. A. S. Hodel, R. H. Hunt, R. A. Cowell, S. E. Van Den Heuvel, M. R. Gunnar, K. M. Thomas, Duration of early adversity and structural brain development in post-institutionalized adolescents. *Neuroimage* **105**, 112–119 (2015).
17. M. A. Mehta, E. Gore-Langton, N. Golembo, E. Colvert, S. C. R. Williams, E. Sonuga-Barke, Hyporesponsive reward anticipation in the basal ganglia following severe institutional deprivation early in life. *J. Cogn. Neurosci.* **22**, 2316–2325 (2009).

18. M. A. Mehta, N. I. Golembo, C. Nosarti, E. Colvert, A. Mota, S. C. R. Williams, M. Rutter, E. J. S. Sonuga-Barke, Amygdala, hippocampal and corpus callosum size following severe early institutional deprivation: The English and Romanian Adoptees study pilot. *J. Child Psychol. Psychiatry* **50**, 943–951 (2009).
19. S. D. Pollak, C. A. Nelson, M. F. Schlaak, B. J. Roeber, S. S. Wewerka, K. L. Wiik, K. A. Frenn, M. M. Loman, M. R. Gunnar, Neurodevelopmental effects of early deprivation in postinstitutionalized children. *Child Dev.* **81**, 224–236 (2010).
20. K. A. McLaughlin, M. A. Sheridan, W. Winter, N. A. Fox, C. H. Zeanah, C. A. Nelson, Widespread reductions in cortical thickness following severe early-life deprivation: A neurodevelopmental pathway to attention-deficit/hyperactivity disorder. *Biol. Psychiatry* **76**, 629–638 (2014).
21. J. A. Silvers, D. S. Lumian, L. Gabard-Durnam, D. G. Gee, B. Goff, D. S. Fareri, C. Caldera, J. Flannery, E. H. Telzer, K. L. Humphreys, N. Tottenham, Previous institutionalization is followed by broader amygdala–hippocampal–PFC network connectivity during aversive learning in human development. *J. Neurosci.* **36**, 6420–6430 (2016).
22. N. Tottenham, T. A. Hare, B. T. Quinn, T. W. McCarry, M. Nurse, T. Gilhooly, A. Millner, A. Galvan, M. C. Davidson, I.-M. Eigsti, K. M. Thomas, P. J. Freed, E. S. Booma, M. R. Gunnar, M. Altemus, J. Aronson, B. J. Casey, Prolonged institutional rearing is associated with atypically large amygdala volume and difficulties in emotion regulation. *Dev. Sci.* **13**, 46–61 (2010).
23. K. A. McLaughlin, M. A. Sheridan, F. Tibu, N. A. Fox, C. H. Zeanah, C. A. Nelson III, Causal effects of the early caregiving environment on development of stress response systems in children. *Proc. Natl. Acad. Sci. U.S.A.* **112**, 5637–5642 (2015).
24. J. Bick, T. Zhu, C. Stamoulis, N. A. Fox, C. Zeanah, C. A. Nelson, Effect of early institutionalization and foster care on long-term white matter development: A randomized clinical trial. *JAMA Pediatr.* **169**, 211–219 (2015).

25. J. Bongaarts, C. Guilmoto, How many more missing women? *Lancet* **386**, 427 (2015).
26. M. J. Grant, S. Yeatman, The relationship between orphanhood and child fostering in sub-Saharan Africa, 1990s-2000s. *Popul. Stud. (Camb)*. **66**, 279–295 (2012).
27. M. Rutter, R. Kumsta, W. Schlotz, E. Sonuga-Barke, Longitudinal studies using a “natural experiment” design: The case of adoptees from Romanian institutions. *J. Am. Acad. Child Adolesc. Psychiatry* **51**, 762–770 (2012).
28. N. K. Mackes, D. Golm, S. Sarkar, R. Kumsta, M. Rutter, G. Fairchild, M. A. Mehta, E. J. S. Sonuga-Barke, on behalf of the ERA Young Adult Follow-up team, Early childhood deprivation is associated with alterations in adult brain structure despite subsequent environmental enrichment. *Proc. Natl. Acad. Sci. U.S.A.* **117**, 641–649 (2020).
29. M. P. Herzberg, A. S. Hodel, R. A. Cowell, R. H. Hunt, M. R. Gunnar, K. M. Thomas, Risk taking, decision-making, and brain volume in youth adopted internationally from institutional care. *Neuropsychologia* **119**, 262–270 (2018).
30. K. L. Mills, A.-L. Goddings, M. M. Herting, R. Meuwese, S.-J. Blakemore, E. A. Crone, R. E. Dahl, B. Güroğlu, A. Raznahan, E. R. Sowell, C. K. Tamnes, Structural brain development between childhood and adulthood: Convergence across four longitudinal samples. *Neuroimage* **141**, 273–281 (2016).
31. K. Z. LeWinn, M. A. Sheridan, K. M. Keyes, A. Hamilton, K. A. McLaughlin, Sample composition alters associations between age and brain structure. *Nat. Commun.* **8**, 874 (2017).
32. N. Gogtay, P. M. Thompson, Mapping gray matter development: Implications for typical development and vulnerability to psychopathology. *Brain Cogn.* **72**, 6–15 (2010).
33. P. S. Goldman-Rakic, Development of cortical circuitry and cognitive function. *Child Dev.* **58**, 601–622 (1987).
34. N. L. Colich, M. A. Sheridan, K. L. Humphreys, M. Wade, F. Tibu, C. A. Nelson, C. H. Zeanah, N. A. Fox, K. A. McLaughlin, Heightened sensitivity to the caregiving environment

during adolescence: Implications for recovery following early-life adversity. *J. Child Psychol. Psychiatry.* **62**, 10.1111/jcpp.13347 (2021).

35. M. Gunnar, C. DePasquale, B. Reid, B. Donzella, Pubertal stress recalibration reverses the effects of early life stress in postinstitutionalized children. *Proc. Natl. Acad. Sci. U.S.A.* **116**, 23984–23988 (2019).
36. T. J. Eluvathingal, H. T. Chugani, M. E. Behen, C. Juhász, O. Muzik, M. Maqbool, D. C. Chugani, M. Makki, Abnormal brain connectivity in children after early severe socioemotional deprivation: A diffusion tensor imaging study. *Pediatrics* **117**, 2093–2100 (2006).
37. R. M. Govindan, M. E. Behen, E. Helder, M. I. Makki, H. T. Chugani, Altered water diffusivity in cortical association tracts in children with early deprivation identified with Tract-Based Spatial Statistics (TBSS). *Cereb. Cortex* **20**, 561–569 (2010).
38. M. E. Behen, O. Muzik, A. S. D. Saporta, B. J. Wilson, D. Pai, J. Hua, H. T. Chugani, Abnormal fronto-striatal connectivity in children with histories of early deprivation: A diffusion tensor imaging study. *Brain Imaging Behav.* **3**, 292–297 (2009).
39. J. L. Hanson, N. Adluru, M. K. Chung, A. L. Alexander, R. J. Davidson, S. D. Pollak, Early neglect is associated with alterations in white matter integrity and cognitive functioning. *Child Dev.* **84**, 1566–1578 (2013).
40. C. H. Zeanah, C. A. Nelson, N. A. Fox, A. T. Smyke, P. Marshall, S. W. Parker, S. Koga, Designing research to study the effects of institutionalization on brain and behavioral development: The Bucharest Early Intervention Project. *Dev. Psychopathol.* **15**, 885–907 (2003).
41. R. A. I. Bethlehem, J. Seidlitz, S. R. White, J. W. Vogel, K. M. Anderson, C. Adamson, S. Adler, G. S. Alexopoulos, E. Anagnostou, A. Areces-Gonzalez, D. E. Astle, B. Auyeung, M. Ayub, J. Bae, G. Ball, S. Baron-Cohen, R. Beare, S. A. Bedford, V. Benegal, F. Beyer, J. Blangero, M. Blesa Cábez, J. P. Boardman, M. Borzage, J. F. Bosch-Bayard, N. Bourke, V.

D. Calhoun, M. M. Chakravarty, C. Chen, C. Chertavian, G. Chetelat, Y. S. Chong, J. H. Cole, A. Corvin, M. Costantino, E. Courchesne, F. Crivello, V. L. Croypley, J. Crosbie, N. Crossley, M. Delarue, R. Delorme, S. Desrivieres, G. A. Devenyi, M. A. Di Biase, R. Dolan, K. A. Donald, G. Donohoe, K. Dunlop, A. D. Edwards, J. T. Ellison, C. T. Ellis, J. A. Elman, L. Eyler, D. A. Fair, E. Feczko, P. C. Fletcher, P. Fonagy, C. E. Franz, L. Galan-Garcia, A. Gholipour, J. Giedd, J. H. Gilmore, D. C. Glahn, I. M. Goodyer, P. E. Grant, N. A. Groenewold, F. M. Gunning, R. E. Gur, R. C. Gur, C. F. Hammill, O. Hansson, T. Hedden, A. Heinz, R. N. Henson, K. Heuer, J. Hoare, B. Holla, A. J. Holmes, R. Holt, H. Huang, K. Im, J. Ipser, C. R. Jack, A. P. Jackowski, T. Jia, K. A. Johnson, P. B. Jones, D. T. Jones, R. S. Kahn, H. Karlsson, L. Karlsson, R. Kawashima, E. A. Kelley, S. Kern, K. W. Kim, M. G. Kitzbichler, W. S. Kremen, F. Lalonde, B. Landeau, S. Lee, J. Lerch, J. D. Lewis, J. Li, W. Liao, C. Liston, M. V. Lombardo, J. Lv, C. Lynch, T. T. Mallard, M. Marcelis, R. D. Markello, S. R. Mathias, B. Mazoyer, P. McGuire, M. J. Meaney, A. Mechelli, N. Medic, B. Misic, S. E. Morgan, D. Mothersill, J. Nigg, M. Q. W. Ong, C. Ortinau, R. Ossenkoppele, M. Ouyang, L. Palaniyappan, L. Paly, P. M. Pan, C. Pantelis, M. M. Park, T. Paus, Z. Pausova, D. Paz-Linares, A. P. Binette, K. Pierce, X. Qian, J. Qiu, A. Qiu, A. Raznahan, T. Rittman, A. Rodrigue, C. K. Rollins, R. Romero-Garcia, L. Ronan, M. D. Rosenberg, D. H. Rowitch, G. A. Salum, T. D. Satterthwaite, H. L. Schaare, R. J. Schachar, A. P. Schultz, G. Schumann, M. Schöll, D. Sharp, R. T. Shinohara, I. Skoog, C. D. Smyser, R. A. Sperling, D. J. Stein, A. Stolicyn, J. Suckling, G. Sullivan, Y. Taki, B. Thyreau, R. Toro, N. Traut, K. A. Tsvetanov, N. B. Turk-Browne, J. J. Tuulari, C. Tzourio, É. Vachon-Preseu, M. J. Valdes-Sosa, P. A. Valdes-Sosa, S. L. Valk, T. van Amelsvoort, S. N. Vandekar, L. Vasung, L. W. Victoria, S. Villeneuve, A. Villringer, P. E. Vértes, K. Wagstyl, Y. S. Wang, S. K. Warfield, V. Warrior, E. Westman, M. L. Westwater, H. C. Whalley, A. V. Witte, N. Yang, B. Yeo, H. Yun, A. Zalesky, H. J. Zar, A. Zettergren, J. H. Zhou, H. Ziauddeen, A. Zugman, X. N. Zuo; 3R-BRAIN; AIBL; Alzheimer's Disease Neuroimaging Initiative; Alzheimer's Disease Repository Without Borders Investigators; CALM Team; Cam-CAN; CCNP; COBRE; cVEDA; ENIGMA Developmental Brain Age Working Group; Developing Human Connectome Project; FinnBrain; Harvard Aging Brain Study; IMAGEN; KNE96; The Mayo Clinic Study of Aging; NSPN; POND; The PREVENT-AD Research Group; VETSA, E. T.



- Bullmore, A. F. Alexander-Bloch, Brain charts for the human lifespan. *Nature* **604**, 525–533 (2022).
42. R. A. Kievit, A. M. Brandmaier, G. Ziegler, A.-L. van Harmelen, S. M. M. de Mooij, M. Moutoussis, I. M. Goodyer, E. Bullmore, P. B. Jones, P. Fonagy; NSPN Consortium, U. Lindenberger, R. J. Dolan, Developmental cognitive neuroscience using latent change score models: A tutorial and applications. *Dev. Cogn. Neurosci.* **33**, 99–117 (2018).
43. M. Wade, N. A. Fox, C. H. Zeanah, C. A. Nelson, Effect of foster care intervention on trajectories of general and specific psychopathology among children with histories of institutional rearing: A randomized clinical trial. *JAMA Psychiat.* **75**, 1137–1145 (2018).
44. N. Gogtay, J. N. Giedd, L. Lusk, K. M. Hayashi, D. Greenstein, A. C. Vaituzis, T. F. Nugent III, D. H. Herman, L. S. Clasen, A. W. Toga, J. L. Rapoport, P. M. Thompson, Dynamic mapping of human cortical development during childhood through early adulthood. *Proc. Natl. Acad. Sci. U.S.A.* **101**, 8174–8179 (2004).
45. P. R. Huttenlocher, A. S. Dabholkar, Regional differences in synaptogenesis in human cerebral cortex. *J. Comp. Neurol.* **387**, 167–178 (1997).
46. M. Tanzer, M. Derome, L. Morosan, G. Salaminios, M. Debbané, Cortical thickness of the insula and prefrontal cortex relates to externalizing behavior: Cross-sectional and prospective findings. *Dev. Psychopathol.* **33**, 1437–1447 (2021).
47. K. E. Shannon, C. Sauder, T. P. Beauchaine, L. M. Gatzke-Kopp, Disrupted effective connectivity between the medial frontal cortex and the caudate in adolescent boys with externalizing behavior disorders. *Crim. Justice Behav.* **36**, 1141–1157 (2009).
48. S. Silveira, S. Boney, S. F. Tapert, J. Mishra, Developing functional network connectivity of the dorsal anterior cingulate cortex mediates externalizing psychopathology in adolescents with child neglect. *Dev. Cogn. Neurosci.* **49**, 100962 (2021).
49. N. M. Fava, E. M. Trucco, M. E. Martz, L. M. Cope, J. M. Jester, R. A. Zucker, M. M. Heitzeg, Childhood adversity, externalizing behavior, and substance use in adolescence:

- Mediating effects of anterior cingulate cortex activation during inhibitory errors. *Dev. Psychopathol.* **31**, 1439–1450 (2019).
50. R. E. Jung, R. J. Haier, The parieto-frontal integration theory (P-FIT) of intelligence: Converging neuroimaging evidence. *Behav. Brain Sci.* **30**, 135–154 (2007).
51. U. A. Tooley, D. S. Bassett, A. P. Mackey, Environmental influences on the pace of brain development. *Nat. Rev. Neurosci.* **22**, 372–384 (2021).
52. B. Larsen, B. Luna, Adolescence as a neurobiological critical period for the development of higher-order cognition. *Neurosci. Biobehav. Rev.* **94**, 179–195 (2018).
53. R. E. Vanderwert, P. J. Marshall, C. A. Nelson, C. H. Zeanah, N. A. Fox, Timing of intervention affects brain electrical activity in children exposed to severe psychosocial neglect. *PLOS ONE* **5**, e11415 (2010).
54. M. Vestergaard, K. S. Madsen, W. F. C. Baaré, A. Skimminge, L. R. Ejersbo, T. Z. Ramsøy, C. Gerlach, P. Akeson, O. B. Paulson, T. L. Jernigan, White matter microstructure in superior longitudinal fasciculus associated with spatial working memory performance in children. *J. Cogn. Neurosci.* **23**, 2135–2146 (2011).
55. E. R. Sowell, P. M. Thompson, K. D. Tessner, A. W. Toga, Mapping continued brain growth and gray matter density reduction in dorsal frontal cortex: Inverse relationships during postadolescent brain maturation. *J. Neurosci.* **21**, 8819–8829 (2001).
56. M. Wade, N. A. Fox, C. H. Zeanah, C. A. Nelson III, Long-term effects of institutional rearing, foster care, and brain activity on memory and executive functioning. *Proc. Natl. Acad. Sci. U.S.A.* **116**, 1808–1813 (2019).
57. I. R. Olson, R. J. Von Der Heide, K. H. Alm, G. Vyas, Development of the uncinate fasciculus: Implications for theory and developmental disorders. *Dev. Cogn. Neurosci.* **14**, 50–61 (2015).

58. M. H. Van Ijzendoorn, M. J. Bakermans-Kranenburg, F. Juffer, Plasticity of growth in height, weight, and head circumference: Meta-analytic evidence of massive catch-up after international adoption. *J. Dev. Behav. Pediatr.* **28**, 334–343 (2007).
59. M. VanTieghem, M. Korom, J. Flannery, T. Choy, C. Caldera, K. L. Humphreys, L. Gabard-Durnam, B. Goff, D. G. Gee, E. H. Telzer, M. Shapiro, J. Y. Louie, D. S. Fareri, N. Bolger, N. Tottenham, Longitudinal changes in amygdala, hippocampus and cortisol development following early caregiving adversity. *Dev. Cogn. Neurosci.* **48**, 100916 (2021).
60. J. D. Van Horn, A. W. Toga, Multi-site neuroimaging trials. *Curr. Opin. Neurol.* **22**, 370–378 (2009).
61. M. H. Teicher, Childhood trauma and the enduring consequences of forcibly separating children from parents at the United States border. *BMC Med.* **16**, 146 (2018).
62. C. H. Zeanah, N. A. Fox, C. A. Nelson, The Bucharest Early Intervention Project: Case study in the ethics of mental health research. *J. Nerv. Ment. Dis.* **200**, 243–247 (2012).
63. F. G. Miller, The randomized controlled trial as a demonstration project: An ethical perspective. *Am. J. Psychiatry* **166**, 743–745 (2009).
64. A. Yendiki, P. Panneck, P. Srinivasan, A. Stevens, L. Zöllei, J. Augustinack, R. Wang, D. Salat, S. Ehrlich, T. Behrens, S. Jbabdi, R. Gollub, B. Fischl, Automated probabilistic reconstruction of white-matter pathways in health and disease using an atlas of the underlying anatomy. *Front. Neuroinform.* **5**, 23 (2011).
65. S. Reig, J. Sánchez-González, C. Arango, J. Castro, A. González-Pinto, F. Ortuño, B. Crespo-Facorro, N. Bargalló, M. Desco, Assessment of the increase in variability when combining volumetric data from different scanners. *Hum. Brain Mapp.* **30**, 355–368 (2009).
66. F. Ségonne, A. M. Dale, E. Busa, M. Glessner, D. Salat, H. K. Hahn, B. Fischl, A hybrid approach to the skull stripping problem in MRI. *Neuroimage* **22**, 1060–1075 (2004).

67. S. S. Ghosh, S. Kakunoori, J. Augustinack, A. Nieto-Castanon, I. Kovelman, N. Gaab, J. A. Christodoulou, C. Triantafyllou, J. D. E. Gabrieli, B. Fischl, Evaluating the validity of volume-based and surface-based brain image registration for developmental cognitive neuroscience studies in children 4 to 11 years of age. *Neuroimage* **53**, 85–93 (2010).
68. J. Jovicich, S. Czanner, X. Han, D. Salat, A. van der Kouwe, B. Quinn, J. Pacheco, M. Albert, R. Killiany, D. Blacker, P. Maguire, D. Rosas, N. Makris, R. Gollub, A. Dale, B. C. Dickerson, B. Fischl, MRI-derived measurements of human subcortical, ventricular and intracranial brain volumes: Reliability effects of scan sessions, acquisition sequences, data analyses, scanner upgrade, scanner vendors and field strengths. *Neuroimage* **46**, 177–192 (2009).
69. M. Reuter, N. J. Schmansky, H. D. Rosas, B. Fischl, Within-subject template estimation for unbiased longitudinal image analysis. *Neuroimage* **61**, 1402–1418 (2012).
70. M. Reuter, H. D. Rosas, B. Fischl, Highly accurate inverse consistent registration: A robust approach. *Neuroimage* **53**, 1181–1196 (2010).
71. Y. Benjamini, Y. Hochberg, Controlling the false discovery rate: A practical and powerful approach to multiple testing. *J. R. Stat. Soc. B. Methodol.* **57**, 289–300 (1995).
72. O. Menyhart, B. Wetz, B. Györfly, [MultipleTesting.com](https://www.multiple-testing.com/): A tool for life science researchers for multiple hypothesis testing correction. *PLOS ONE* **16**, e0245824 (2021).
73. M. J. Essex, W. T. Boyce, L. H. Goldstein, J. M. Armstrong, H. C. Kraemer, D. J. Kupfer, The confluence of mental, physical, social, and academic difficulties in middle childhood. II: Developing the Macarthur Health and Behavior Questionnaire. *J. Am. Acad. Child Adolesc. Psychiatry* **41**, 588–603 (2002).
74. D. Wechsler, *The Wechsler Intelligence Scale for Children—Fourth Edition* (The Psychological Corporation, 2004).
75. K. L. Humphreys, L. S. King, K. L. Guyon-Harris, M. A. Sheridan, K. A. McLaughlin, A. Radulescu, C. A. Nelson, N. A. Fox, C. H. Zeanah, Foster care leads to sustained cognitive

gains following severe early deprivation, in *Proceedings of the National Academy of Sciences* (2022).

76. D. Wechsler, *Wechsler Adult Intelligence Scale—Fourth Edition* (Pearson Assessment, 2008).

77. D. N. Greve, B. Fischl, False positive rates in surface-based anatomical analysis. *Neuroimage* **171**, 6–14 (2018).

78. R. S. Desikan, F. Ségonne, B. Fischl, B. T. Quinn, B. C. Dickerson, D. Blacker, R. L. Buckner, A. M. Dale, R. P. Maguire, B. T. Hyman, M. S. Albert, R. J. Killiany, An automated labeling system for subdividing the human cerebral cortex on MRI scans into gyral based regions of interest. *Neuroimage* **31**, 968–980 (2006).
